# Supplementary material
Source: PubMed Central journal article supplement (PMC7747936)
Supplement: NIHMS1628982-supplement-supporting_information.pdf [file NIHMS1628982-supplement-supporting_information.pdf]

## Supplemental Material

### Comparison of 4-Mercaptobenzoic Acid SERS Based Methods for pH Determination In Cells

Brian T. Scarpitti, Amy M. Morrison, Marina Buyanova and Zachary D. Schultz\*

Department of Chemistry and Biochemistry, The Ohio State University, 100 W. 18<sup>th</sup> Ave,  
Columbus, OH 43210, USA

\*Corresponding author email: schultz.133@osu.edu

#### Table of Contents

|                                                                                                        |     |
|--------------------------------------------------------------------------------------------------------|-----|
| <b>Figure S1:</b> Extinction spectra of NS used before respective functionalization.....               | S-2 |
| <b>Table SI:</b> Extinction maxima, particle concentration, and size for the NS as synthesized.....    | S-3 |
| <b>Figure S2:</b> Transmission electron microscope image of unfunctionalized NS.....                   | S-3 |
| <b>Figure S3:</b> PC1 loading determined from the calibration data used to generate the pH models..... | S-4 |
| <b>Figure S4:</b> SERS spectra of NS after functionalization.....                                      | S-4 |

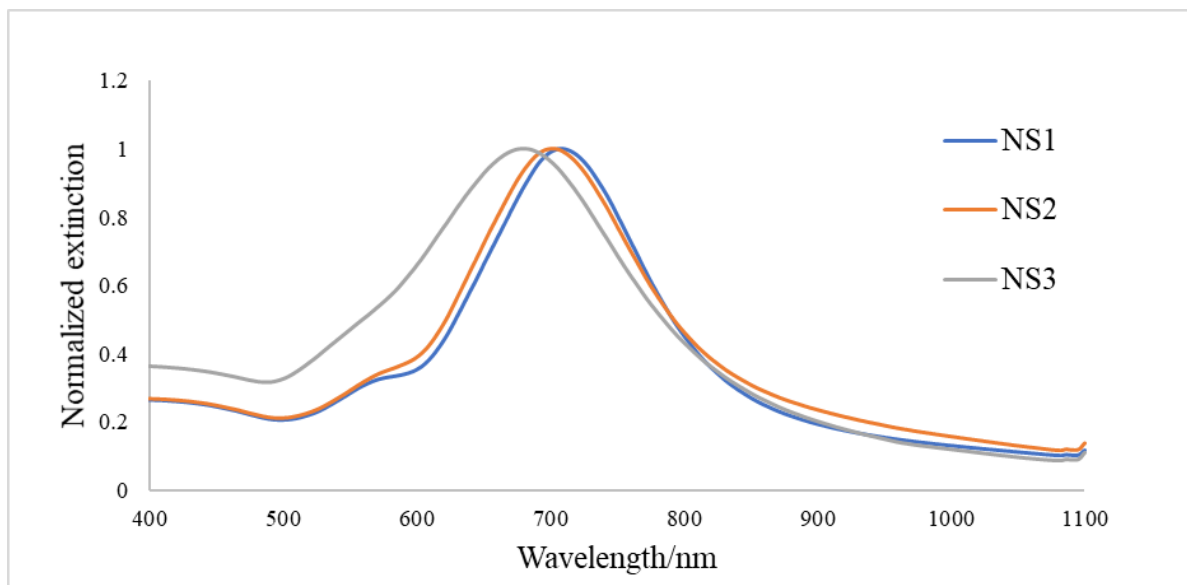

**Figure S1:** Extinction spectra of NS used before respective functionalization. Differences are representative of batch-to-batch variation in NS synthesis. NS1 and NS2 were functionalized with MBA for calibration experiments, NS3 was functionalized with a cell penetrating peptide (CPP12-Cys) and MBA for experiments in cells.

**Table SI:** Extinction maxima, particle concentration, and size for the NS as synthesized

|                                                                                     | <b>NS1</b>                       | <b>NS2</b>                       | <b>NS3</b>                    |
|-------------------------------------------------------------------------------------|----------------------------------|----------------------------------|-------------------------------|
| <b>Extinction maximum</b>                                                           | <b>709 nm</b>                    | <b>702 nm</b>                    | <b>680 nm</b>                 |
| <b>NTA particle concentration (particles per mL) +/- standard error of the mean</b> | $3.56(\pm 0.080) \times 10^{10}$ | $2.97(\pm 0.096) \times 10^{10}$ | $2.54(\pm 0.066) \times 10^9$ |
| <b>NTA size (nm) +/- standard deviation</b>                                         | 111( $\pm$ 26)                   | 113( $\pm$ 24)                   | 117( $\pm$ 19)                |

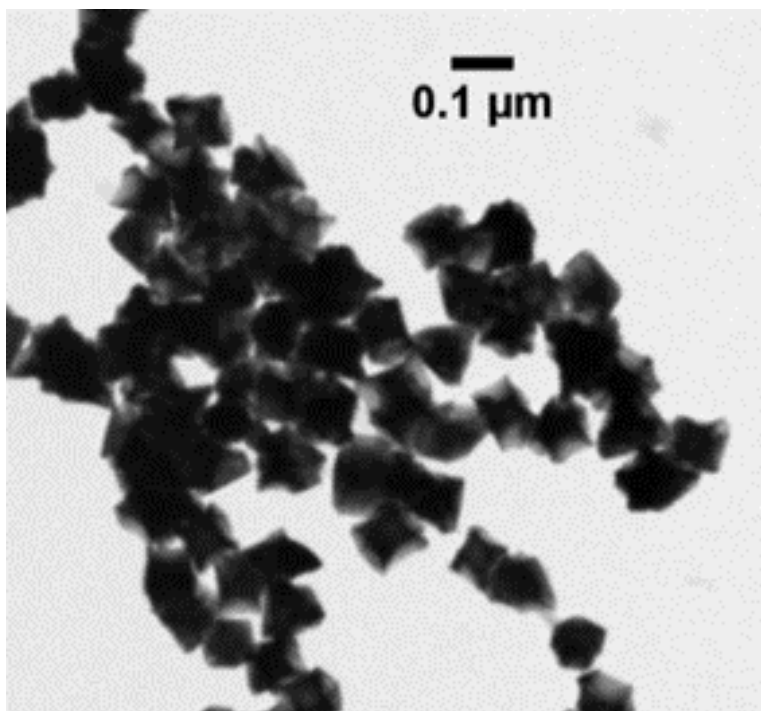

**Figure S2:** Transmission electron microscope image of unfunctionalized NS used in this study.

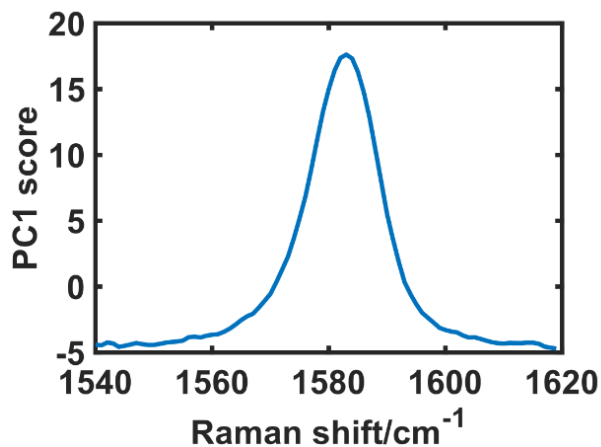

**Figure S3:** PC1 loading determined from the calibration data used to generate the pH models.

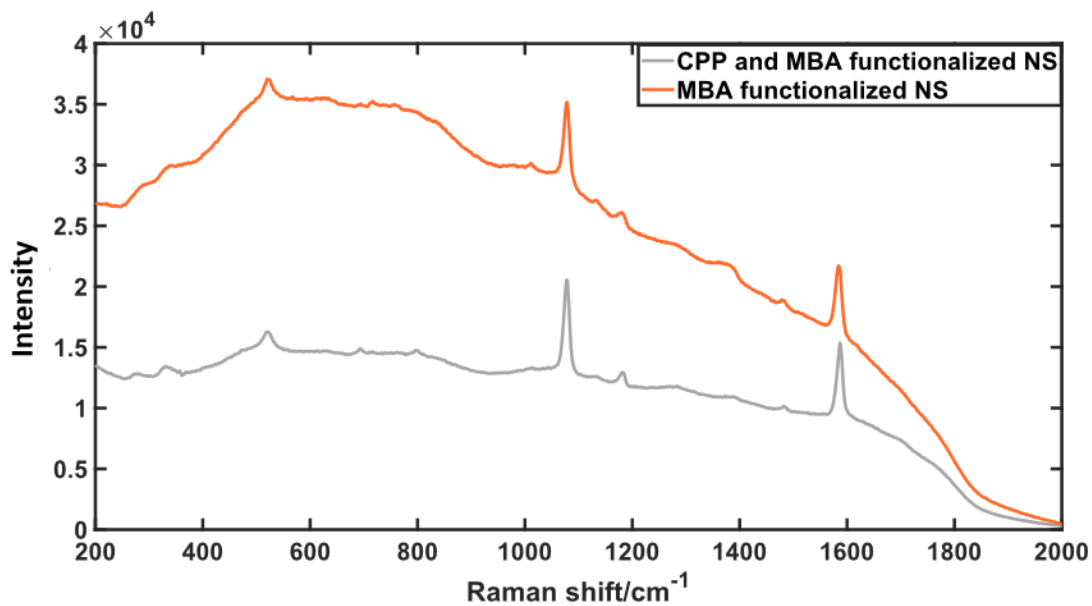

**Figure S4:** SERS spectra of NS after functionalization: MBA functionalized NS2 and CPP and MBA functionalized NS3. CPP is not seen to significantly influence the spectra. NS solutions are at different dilutions and pH was not controlled.
